# Supplementary material
Source: publisher figshare collection journal article supplement (https://acs.figshare.com/ndownloader/files/5053387)
Supplement: Supplementary file 1 [file 5053387]

## Supplemental Information

### **Instrument-free synthesizable fabrication of label-free optical biosensing paper strips for the early detection of infectious keratoconjunctivitis**

Wansun Kim, Jae-Chul Lee, Jae-Ho Shin, Kyung-Hyun Jin, Hun-Kuk Park\*, Samjin Choi\*

Department of Biomedical Engineering,  
College of Medicine,  
Kyung Hee University,  
Seoul 130-701,  
South Korea

#### **\*Address for correspondence:**

Samjin Choi, Ph.D., and Hun-Kuk Park, M.D., Ph.D.,  
Department of Biomedical Engineering,  
College of Medicine,  
Kyung Hee University,  
1 Hoegi-dong,  
Dongdaemun-gu,  
Seoul 130-701,  
South Korea  
Tel: +82 2 961 0290  
Fax: +82 2 6008 5535  
E-mail: [medchoi@khu.ac.kr](mailto:medchoi@khu.ac.kr)

## ■ Raman spectrum of 2-NAT molecule

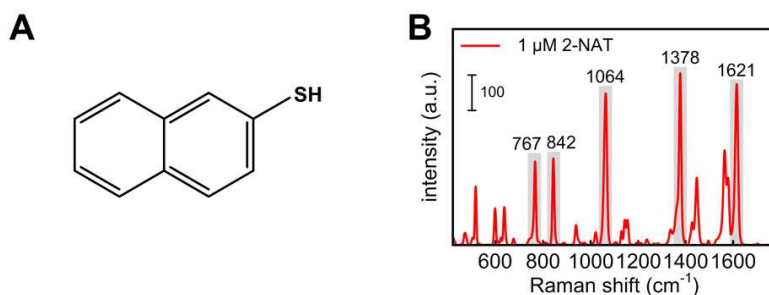

**Figure S1. (A) The molecular structure of 2-naphthalenethiol (2-NAT) and (B) Raman spectra of a 1  $\mu\text{M}$  2-NAT molecule for GNPs deposited on paper with optimal SILAR condition.** The prominent Raman peaks of the 2-NAT molecule were obtained at 767 cm<sup>-1</sup> (C-H wag), 842 cm<sup>-1</sup> (C-H twist), 1064 cm<sup>-1</sup> (symmetric C-H bend), 1378 cm<sup>-1</sup> (ring stretch), and 1621 cm<sup>-1</sup> (ring stretch).

## ■ Distribution of GNPs with number of SILAR cycles (10 mM SILAR reagents)

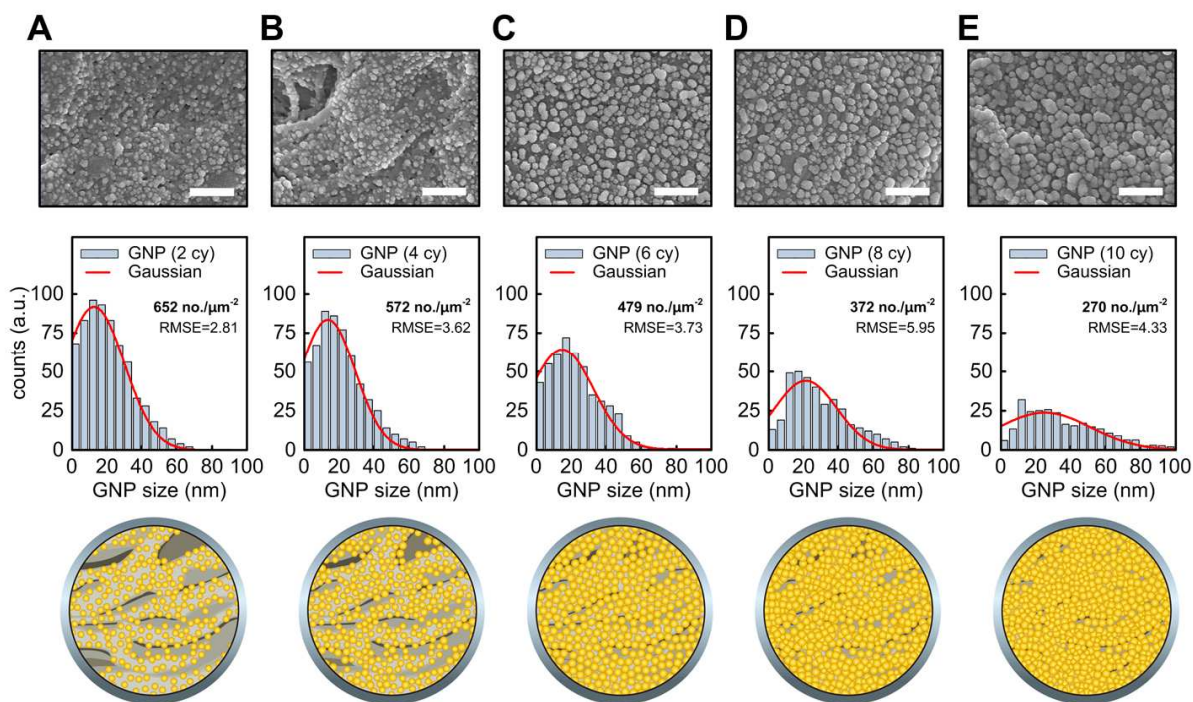

**Figure S2. Distributions of SILAR-synthesized GNPs deposited on paper with (A) two, (B) four, (C) six, (D) eight, and (E) 10 SILAR cycles** (top: SEM. Scale bar=250 nm; middle: GNP distribution; bottom: schematic distribution). The surface density of GNP was represented by the number of GNP per unit area (no./μm<sup>2</sup>). RMSE indicates the root mean square error between the Gaussian-predicted data and experimental data.

## ■ Distribution of SILAR reagent-concentrated GNPs with number of SILAR cycles

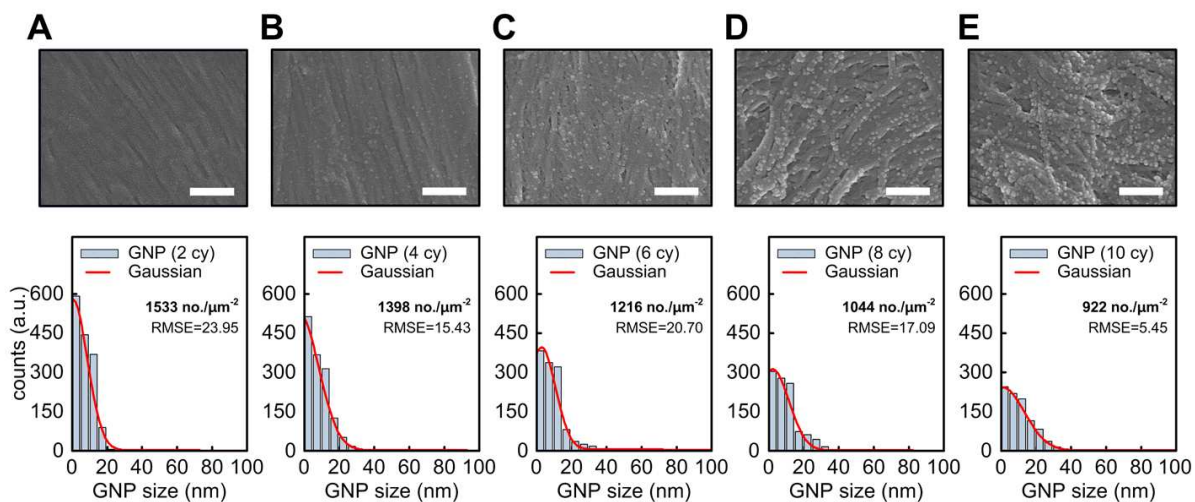

**Figure S3.** Distributions of SILAR-synthesized GNPs deposited on paper with (A) two, (B) four, (C) six, (D) eight, and (E) 10 SILAR using 1 mM HAuCl<sub>4</sub> and NaBH<sub>4</sub> SILAR reagents. (top: SEM. Scale bar=250 nm; bottom: GNP distribution). The surface density of GNP was represented by the number of GNP per unit area (no./μm<sup>2</sup>). RMSE indicates the root mean square error between the Gaussian-predicted data and experimental data.

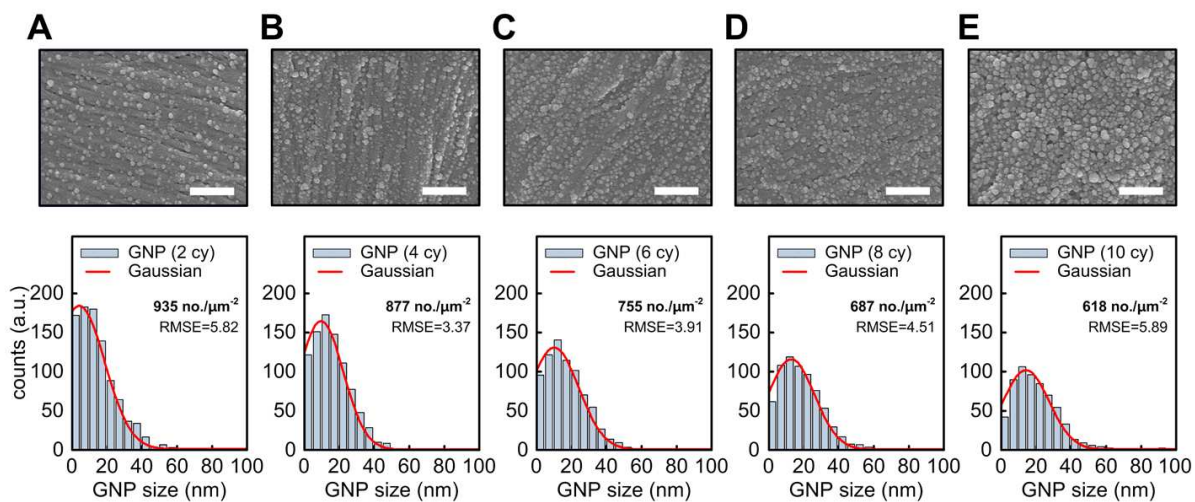

**Figure S4.** Distributions of SILAR-synthesized GNPs deposited on paper with (A) two, (B) four, (C) six, (D) eight, and (E) 10 SILAR using 5 mM HAuCl<sub>4</sub> and NaBH<sub>4</sub> SILAR reagents. (top: SEM. Scale bar=250 nm; bottom: GNP distribution). The surface density of GNP was represented by the number of GNP per unit area (no./μm<sup>2</sup>). RMSE indicates the root mean square error between the Gaussian-predicted data and experimental data.

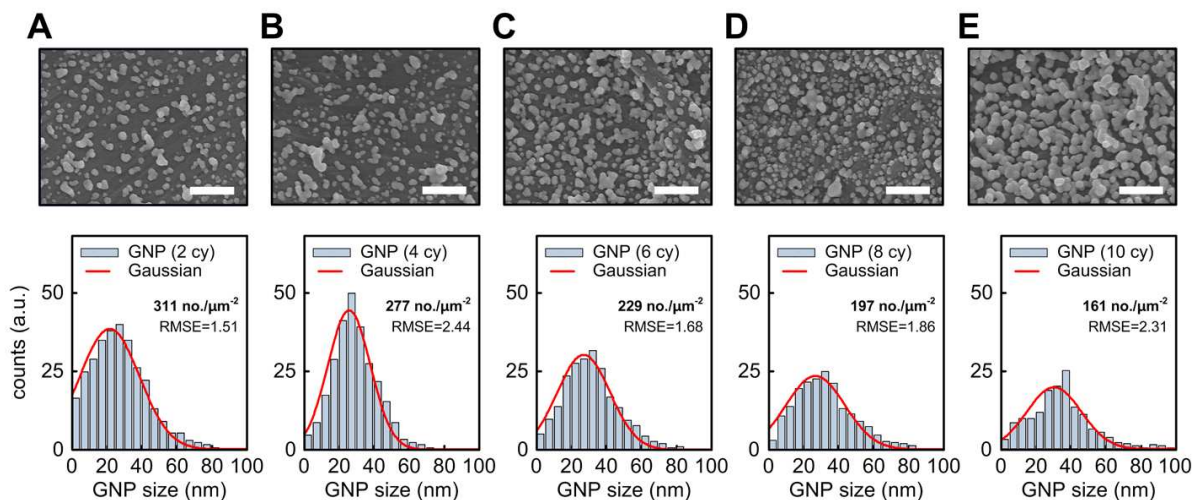

**Figure S5. Distributions of SILAR-synthesized GNPs deposited on paper with (A) two, (B) four, (C) six, (D) eight, and (E) 10 SILAR using 20 mM SILAR HAuCl<sub>4</sub> and NaBH<sub>4</sub> reagents.** (top: SEM. Scale bar=250 nm; bottom: GNP distribution). The surface density of GNP was represented by the number of GNP per unit area (no./μm<sup>2</sup>). RMSE indicates the root mean square error between the Gaussian-predicted data and experimental data.

## ■ Computational modeling

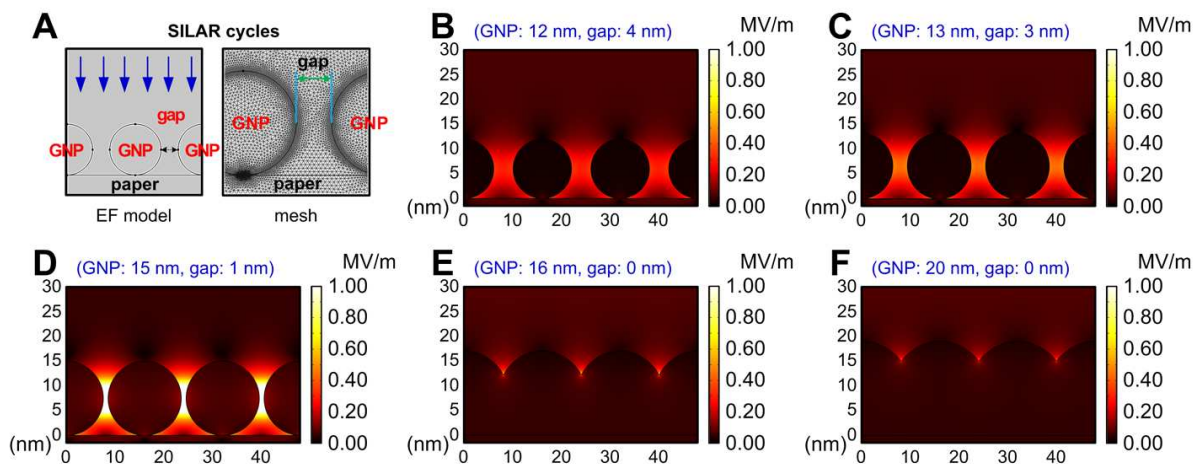

**Figure S6. (A) Finite element model of GNPs with SILAR cycles and computational results of GNP diameter and interparticle gap distance-dependent LSPR effect with (B) two, (C) four, (D) six, (E) eight, and (F) 10 SILAR cycles on the electromagnetic field (EF).**



## ■ Sensitivity

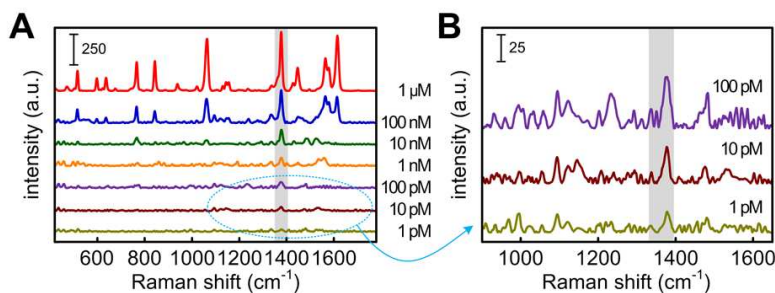

**Figure S7.** Representative SERS spectra with (A) different 2-NAT concentrations ( $10^{-12} \sim 10^{-6}$  M) and (B) low concentrations of 2-NAT on SILAR-synthesized GNPs deposited on SERS paper. Gray indicates a 2-NAT molecule-characterized peak at  $1378 \text{ cm}^{-1}$ .

## ■ Enhancement factor

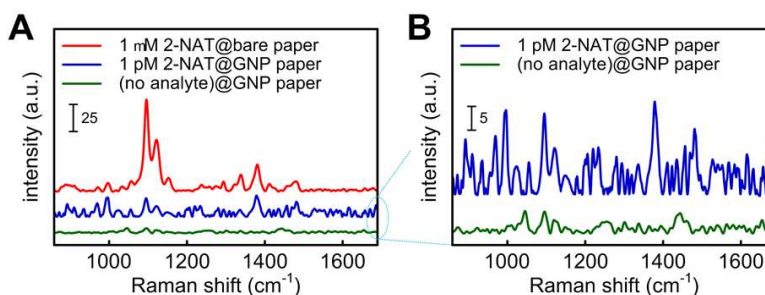

**Figure S8.** Raman spectra of 1 mM 2-NAT on bare paper and 1 pM 2-NAT and no analyte on SILAR-synthesized GNP paper strip.

The enhancement factor (EF) was calculated as the difference in Raman intensity between two different substrates as

$$EF = \left( \frac{I_{\text{SERS}}}{I_{\text{bare}}} \right) \left( \frac{N_{\text{bare}}}{N_{\text{SERS}}} \right), \quad (\text{S1})$$

where  $I_{\text{SERS}}$  and  $I_{\text{bare}}$  are the Raman intensity of the molecule on the SERS and bare papers, respectively, and  $N_{\text{SERS}}$  and  $N_{\text{bare}}$  are the average number of adsorbed molecules in the scattering volume for SERS and non-SERS areas, respectively.<sup>1</sup> Assuming that the probe molecules were uniformly distributed on the substrates, the number of adsorbed molecules can be estimated as

$$N = \left( N_A \cdot c \cdot \frac{V_{\text{droplet}}}{A_{\text{spot}}} \right) A_{\text{laser}}, \quad (\text{S2})$$

where  $N_A$  is Avogadro's constant,  $c$  is the concentration of the probe molecule,  $V$  is the volume of the molecule droplet,  $A_{\text{spot}}$  is the size of the substrate, and  $A_{\text{laser}}$  is the size of the laser spot.<sup>2</sup> Since the same methods for assessing the Raman measurement were applied to two substrates, the parameters of  $N_A$  for 2-NAT,  $V$ ,  $A_{\text{spot}}$ , and  $A_{\text{laser}}$  were the same.

Therefore, Eq. (S2) can be written as

$$EF = \left( \frac{I_{SERS}}{I_{bare}} \right) \left( \frac{c_{bare}}{c_{SERS}} \right), \quad (S3)$$

where  $c_{SERS}$  and  $c_R$  are the concentration of 2-NAT molecule on the GNP and bare papers, respectively.

## ■ Bio-applications

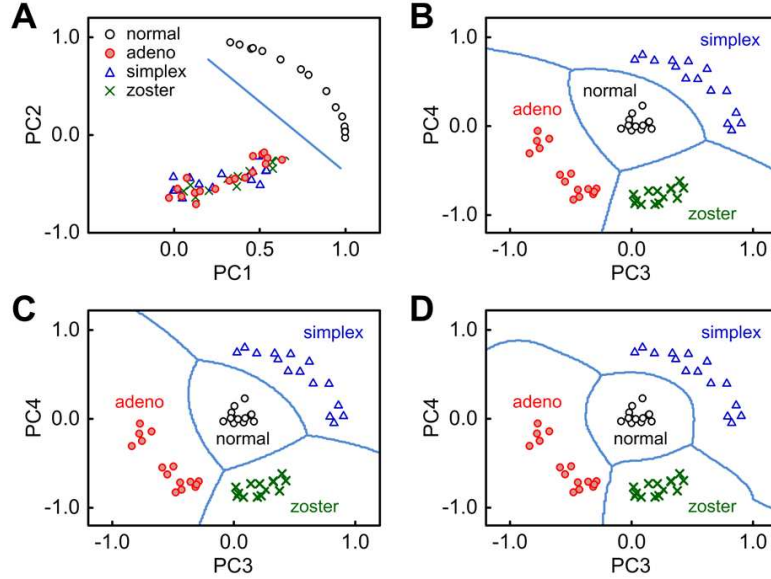

**Figure S9. PCA-SVM scores (n=15, each): (A) to detect the presence of keratoconjunctivitis using SVM classifier with linear kernel and to classify the normal eye and keratoconjunctivides using SVM classifier with (B) the second-order polynomial kernel ( $d=2$ , Eq. S4), (C) Gaussian kernel ( $\sigma=2$ , Eq. S5), and (D) Hilbert transform radial basis function kernel ( $\rho=2$ ,  $a=1$ ,  $b=2$ , Eq. S6).<sup>3,4</sup>**

$$K_{poly}(\mathbf{x}_1, \mathbf{x}_2) = (\langle \mathbf{x}_1 \cdot \mathbf{x}_2 \rangle + 1)^d \quad (S4)$$

$$K_{Gaussian}(\mathbf{x}_1, \mathbf{x}_2) = \exp\left(-\|\mathbf{x}_1 - \mathbf{x}_2\|^2 / 2\sigma^2\right) \quad (S5)$$

$$K_{HiBRF}(\mathbf{x}_1, \mathbf{x}_2) = \exp\left(-\rho \sum_i |\mathbf{x}_{1i}^a - \mathbf{x}_{2i}^a|^b\right) \quad (S6)$$

## ■ References

- (1) Le Ru, E. C.; Blackie, E.; Meyer, M.; Etchegoin, P. G. *J. Phys. Chem. C* **2007**, *111* (37), 13794–13803.
- (2) Liu, X.; Shao, Y.; Tang, Y.; Yao, K.-F. *Sci. Rep.* **2014**, *4*, 5835.
- (3) Choi, S.; Jiang, Z. *Comput. Biol. Med.* **2010**, *40* (1), 8–20.
- (4) Jung, G. B.; Nam, S. W.; Choi, S.; Lee, G.-J.; Park, H.-K. *Biomed. Opt. Express* **2014**, *5* (9), 3238.
